# Supplementary material for: Regional Differences in Antithrombotic Treatment for Atrial Fibrillation: Insights from the GLORIA-AF Phase II Registry
Source: PubMed Central journal article supplement — Thromb Haemost. 2017 Dec 6;117(12):2376–88. doi: 10.1160/TH17-08-0555 (PMC6260111; doi:10.1160/th17-08-0555), 2017-12-06
Supplement: 10-1160-th17-08-0555-s170555.pdf [file 10-1160-th17-08-0555-s170555.pdf]

**Table S1** Log-binomial regression analysis for factors associated with prescription of oral anticoagulation (VKA, NOAC) against other treatment (antiplatelet or no treatment)<sup>a</sup>

|                                  | Univariate regression                                         | Multivariable regression                                      |
|----------------------------------|---------------------------------------------------------------|---------------------------------------------------------------|
|                                  | Relative risk (95% CI) for prescription of VKA/NOAC vs. other | Relative risk (95% CI) for prescription of VKA/NOAC vs. other |
| <b>Age category</b>              |                                                               |                                                               |
| <65 y                            | 1.0 (ref)                                                     | 1.0 (ref)                                                     |
| 65–74 y                          | 1.107 (1.083–1.133)                                           | 1.015 (1.002–1.034)                                           |
| ≥75 y                            | 1.131 (1.107–1.156)                                           | 1.010 (0.993–1.030)                                           |
| <b>Gender</b>                    |                                                               |                                                               |
| Male                             | 1.0 (ref)                                                     | 1.0 (ref)                                                     |
| Female                           | 0.994 (0.978–1.010)                                           | 0.988 (0.977–0.997)                                           |
| <b>Type of AF</b>                |                                                               |                                                               |
| Paroxysmal                       | 1.0 (ref)                                                     | 1.0 (ref)                                                     |
| Persistent                       | 1.117 (1.097–1.136)                                           | 1.063 (1.048–1.079)                                           |
| Permanent                        | 1.221 (1.198–1.244)                                           | 1.078 (1.059–1.096)                                           |
| <b>Categorization of AF</b>      |                                                               |                                                               |
| Symptomatic                      | 1.017 (0.997–1.038)                                           | 1.002 (0.987–1.014)                                           |
| Minimally symptomatic            | 0.973 (0.955–0.992)                                           | 1.012 (1.000–1.023)                                           |
| Asymptomatic                     | 1.0 (ref)                                                     | 1.0 (ref)                                                     |
| <b>AF cardioversion</b>          |                                                               |                                                               |
| No/unknown                       | 1.0 (ref)                                                     | 1.0 (ref)                                                     |
| AF cardioversion                 | 1.027 (1.006–1.048)                                           | 1.007 (0.993–1.018)                                           |
| <b>Hypertension</b>              |                                                               |                                                               |
| No/unknown                       | 1.0 (ref)                                                     | 1.0 (ref)                                                     |
| Yes                              | 1.092 (1.070–1.114)                                           | 1.018 (1.005–1.035)                                           |
| <b>Diabetes mellitus</b>         |                                                               |                                                               |
| No/unknown                       | 1.0 (ref)                                                     | 1.0 (ref)                                                     |
| Yes                              | 1.047 (1.028–1.065)                                           | 1.001 (0.991–1.010)                                           |
| <b>Previous stroke/TIA</b>       |                                                               |                                                               |
| No/unknown                       | 1.0 (ref)                                                     | 1.0 (ref)                                                     |
| Yes                              | 1.042 (1.019–1.063)                                           | 1.012 (1.001–1.022)                                           |
| <b>Congestive heart failure</b>  |                                                               |                                                               |
| No/unknown                       | 1.0 (ref)                                                     | 1.0 (ref)                                                     |
| Yes                              | 1.025 (1.007–1.044)                                           | 1.001 (0.993–1.012)                                           |
| <b>Coronary artery disease</b>   |                                                               |                                                               |
| No/unknown                       | 1.0 (ref)                                                     | 1.0 (ref)                                                     |
| Yes                              | 0.929 (0.909–0.948)                                           | 0.973 (0.952–0.992)                                           |
| <b>Myocardial infarction</b>     |                                                               |                                                               |
| No/unknown                       | 1.0 (ref)                                                     | 1.0 (ref)                                                     |
| Yes                              | 0.956 (0.929–0.983)                                           | 0.981 (0.953–1.008)                                           |
| <b>Peripheral artery disease</b> |                                                               |                                                               |
| No/unknown                       | 1.0 (ref)                                                     | 1.0 (ref)                                                     |
| Yes                              | 1.016 (0.969–1.058)                                           | 0.990 (0.946–1.017)                                           |
| <b>Previous bleeding events</b>  |                                                               |                                                               |
| No/unknown                       | 1.0 (ref)                                                     | 1.0 (ref)                                                     |

|                                                          |                     |                     |
|----------------------------------------------------------|---------------------|---------------------|
| Yes                                                      | 0.957 (0.919–0.992) | 0.998 (0.968–1.016) |
| Chronic kidney disease, creatinine clearance < 60 mL/min |                     |                     |
| No/unknown                                               | 1.0 (ref)           | 1.0 (ref)           |
| Yes                                                      | 0.995 (0.976–1.014) | 0.988 (0.973–1.002) |
| Alcohol abuse                                            |                     |                     |
| No/unknown                                               | 1.0 (ref)           | 1.0 (ref)           |
| Yes                                                      | 1.019 (0.987–1.049) | 1.014 (0.998–1.024) |
| Cancer                                                   |                     |                     |
| No/unknown                                               | 1.0 (ref)           | 1.0 (ref)           |
| Yes                                                      | 1.041 (1.014–1.067) | 1.011 (0.989–1.025) |
| Chronic gastrointestinal diseases                        |                     |                     |
| No/unknown                                               | 1.0 (ref)           | 1.0 (ref)           |
| Yes                                                      | 1.000 (0.976–1.023) | 1.006 (0.992–1.019) |
| Medical treatment reimbursed: self-pay/no coverage       |                     |                     |
| No/unknown                                               | 1.0 (ref)           | 1.0 (ref)           |
| Yes                                                      | 0.932 (0.898–0.964) | 0.989 (0.961–1.012) |
| CHADS <sub>2</sub> score                                 |                     |                     |
| Low risk (score 0)                                       | 0.773 (0.740–0.805) | 0.950 (0.907–0.993) |
| Moderate risk (score 1)                                  | 0.921 (0.905–0.938) | 0.982 (0.964–0.999) |
| High risk (score ≥2)                                     | 1.0 (ref)           | 1.0 (ref)           |
| CHA <sub>2</sub> DS <sub>2</sub> -VASc score             |                     |                     |
| Low risk (score 1 in women)                              | 0.560 (0.496–0.626) | 0.628 (0.548–0.712) |
| Moderate risk (score 1 in men)                           | 0.849 (0.822–0.876) | 0.906 (0.875–0.937) |
| High risk (score ≥2)                                     | 1.0 (ref)           | 1.0 (ref)           |
| HAS-BLED score                                           |                     |                     |
| Low risk (score 0–2)                                     | 1.0 (ref)           | 1.0 (ref)           |
| High risk (score ≥3)                                     | 0.775 (0.743–0.807) | 0.792 (0.761–0.823) |
| Region                                                   |                     |                     |
| Region 1: Asia                                           | 0.612 (0.592–0.632) | 0.663 (0.640–0.687) |
| Region 2: Europe                                         | 1.0 (ref)           | 1.0 (ref)           |
| Region 3: North America                                  | 0.871 (0.854–0.887) | 0.912 (0.893–0.930) |
| Region 4: Latin America                                  | 0.946 (0.919–0.972) | 0.963 (0.936–0.986) |
| Region 5: Africa/Middle East                             | 0.970 (0.938–0.999) | 1.005 (0.976–1.022) |
| Type of site                                             |                     |                     |
| Specialist office                                        | 1.050 (1.028–1.073) | 1.019 (1.007–1.032) |
| Community hospital                                       | 1.134 (1.112–1.157) | 1.019 (1.007–1.031) |
| University hospital                                      | 1.0 (ref)           | 1.0 (ref)           |
| Other <sup>b</sup>                                       | 1.046 (1.014–1.078) | 1.007 (0.984–1.021) |

Abbreviations: AF, atrial fibrillation; CI, confidence interval; CHADS<sub>2</sub>, congestive heart failure, hypertension, age ≥ 75 years, diabetes mellitus, stroke; CHA<sub>2</sub>DS<sub>2</sub>-VASc, congestive heart failure, hypertension, age ≥ 75 years (doubled), diabetes, stroke/transient ischaemic attack/thromboembolism (doubled), vascular disease (prior myocardial infarction [MI], peripheral arterial disease [PAD] or aortic plaque), age 65 to 74 years, sex category (female); HAS-BLED, hypertension, abnormal renal and liver function, stroke, bleeding, labile INR (international normalized ratio), age ≥65 years, drugs or alcohol; NOAC, non-vitamin K antagonist oral anticoagulant; ref, reference; TIA, transient ischaemic attack; VKA, vitamin K antagonists.

Note: The COPY method was applied to the multivariable regression.

<sup>a</sup>In total, 1,788 patients were excluded from the multivariable analysis (1,786 for missing HAS-BLED values and 2 for missing CHADS<sub>2</sub> score).

<sup>b</sup>Other site category comprises the following subcategories: general practitioner/outpatient health care/anticoagulation clinic and other.

**Table S2** Log-binomial regression analysis for factors associated with prescription of NOAC against VKA<sup>a</sup>

|                                  | Univariate regression                                   | Multivariable regression                                |
|----------------------------------|---------------------------------------------------------|---------------------------------------------------------|
|                                  | Relative risk (95% CI) for prescription of NOAC vs. VKA | Relative risk (95% CI) for prescription of NOAC vs. VKA |
| <b>Age category</b>              |                                                         |                                                         |
| <65 y                            | 1.0 (ref)                                               | 1.0 (ref)                                               |
| 65–74 y                          | 1.012 (0.974–1.051)                                     | 1.019 (0.975–1.065)                                     |
| ≥75 y                            | 0.958 (0.923–0.995)                                     | 0.988 (0.940–1.038)                                     |
| <b>Gender</b>                    |                                                         |                                                         |
| Male                             | 1.0 (ref)                                               | 1.0 (ref)                                               |
| Female                           | 0.977 (0.948–1.006)                                     | 0.977 (0.947–1.009)                                     |
| <b>Type of AF</b>                |                                                         |                                                         |
| Paroxysmal                       | 1.0 (ref)                                               | 1.0 (ref)                                               |
| Persistent                       | 0.900 (0.872–0.930)                                     | 0.927 (0.897–0.958)                                     |
| Permanent                        | 0.904 (0.861–0.947)                                     | 0.970 (0.923–1.017)                                     |
| <b>Categorization of AF</b>      |                                                         |                                                         |
| Symptomatic                      | 1.012 (0.975–1.050)                                     | 0.990 (0.954–1.028)                                     |
| Minimally symptomatic            | 0.988 (0.954–1.023)                                     | 0.996 (0.962–1.031)                                     |
| Asymptomatic                     | 1.0 (ref)                                               | 1.0 (ref)                                               |
| <b>AF cardioversion</b>          |                                                         |                                                         |
| No/unknown                       | 1.0 (ref)                                               | 1.0 (ref)                                               |
| AF cardioversion                 | 1.218 (1.177–1.258)                                     | 1.175 (1.135–1.215)                                     |
| <b>Hypertension</b>              |                                                         |                                                         |
| No/unknown                       | 1.0 (ref)                                               | 1.0 (ref)                                               |
| Yes                              | 1.078 (1.040–1.119)                                     | 1.038 (0.995–1.085)                                     |
| <b>Diabetes mellitus</b>         |                                                         |                                                         |
| No/unknown                       | 1.0 (ref)                                               | 1.0 (ref)                                               |
| Yes                              | 0.937 (0.904–0.971)                                     | 0.922 (0.884–0.961)                                     |
| <b>Previous stroke/TIA</b>       |                                                         |                                                         |
| No/unknown                       | 1.0 (ref)                                               | 1.0 (ref)                                               |
| Yes                              | 1.034 (0.993–1.076)                                     | 1.046 (0.998–1.094)                                     |
| <b>Congestive heart failure</b>  |                                                         |                                                         |
| No/unknown                       | 1.0 (ref)                                               | 1.0 (ref)                                               |
| Yes                              | 0.948 (0.915–0.982)                                     | 0.975 (0.937–1.015)                                     |
| <b>Coronary artery disease</b>   |                                                         |                                                         |
| No/unknown                       | 1.0 (ref)                                               | 1.0 (ref)                                               |
| Yes                              | 1.023 (0.985–1.061)                                     | 1.040 (0.997–1.082)                                     |
| <b>Myocardial infarction</b>     |                                                         |                                                         |
| No/unknown                       | 1.0 (ref)                                               | 1.0 (ref)                                               |
| Yes                              | 0.880 (0.832–0.929)                                     | 0.854 (0.801–0.908)                                     |
| <b>Peripheral artery disease</b> |                                                         |                                                         |
| No/unknown                       | 1.0 (ref)                                               | 1.0 (ref)                                               |
| Yes                              | 0.980 (0.896–1.063)                                     | 1.011 (0.922–1.097)                                     |

|                                                          |                     |                      |
|----------------------------------------------------------|---------------------|----------------------|
| Previous bleeding events                                 |                     |                      |
| No/unknown                                               | 1.0 (ref)           | 1.0 (ref)            |
| Yes                                                      | 0.946 (0.880–1.011) | 0.935 (0.868–1.001)  |
| Chronic kidney disease, creatinine clearance < 60 mL/min |                     |                      |
| No/unknown                                               | 1.0 (ref)           | 1.0 (ref)            |
| Yes                                                      | 0.893 (0.861–0.926) | 0.923 (0.887–0.960)  |
| Alcohol abuse                                            |                     |                      |
| No/unknown                                               | 1.0 (ref)           | 1.0 (ref)            |
| Yes                                                      | 0.977 (0.918–1.035) | 0.958 (0.900–1.015)  |
| Cancer                                                   |                     |                      |
| No/unknown                                               | 1.0 (ref)           | 1.0 (ref)            |
| Yes                                                      | 1.035 (0.985–1.085) | 1.043 (0.992–1.092)  |
| Chronic gastrointestinal diseases                        |                     |                      |
| No/unknown                                               | 1.0 (ref)           | 1.0 (ref)            |
| Yes                                                      | 1.066 (1.022–1.110) | 1.054 (1.013, 1.093) |
| Medical treatment reimbursed: self-pay/no coverage       |                     |                      |
| No/unknown                                               | 1.0 (ref)           | 1.0 (ref)            |
| Yes                                                      | 0.977 (0.918–1.036) | 1.004 (0.948–1.055)  |
| CHADS <sub>2</sub> score                                 |                     |                      |
| Low risk (score 0)                                       | 0.969 (0.908–1.031) | 0.984 (0.890–1.085)  |
| Moderate risk (score 1)                                  | 1.041 (1.009–1.074) | 1.011 (0.964–1.061)  |
| High risk (score ≥2)                                     | 1.0 (ref)           | 1.0 (ref)            |
| CHA <sub>2</sub> DS <sub>2</sub> -VASc score             |                     |                      |
| Low risk (Score 1 in women)                              | 0.890 (0.757–1.023) | 0.900 (0.742–1.069)  |
| Moderate risk (score 1 in men)                           | 1.031 (0.982–1.079) | 0.981 (0.923–1.041)  |
| High risk (score ≥2)                                     | 1.0 (ref)           | 1.0 (ref)            |
| HAS-BLED score                                           |                     |                      |
| Low risk (score 0–2)                                     | 1.0 (ref)           | 1.0 (ref)            |
| High risk (score ≥3)                                     | 0.972 (0.915–1.028) | 0.993 (0.934–1.051)  |
| Region                                                   |                     |                      |
| Region 1: Asia                                           | 0.865 (0.820–0.910) | 0.989 (0.937–1.041)  |
| Region 2: Europe                                         | 1.0 (ref)           | 1.0 (ref)            |
| Region 3: North America                                  | 1.146 (1.108–1.186) | 0.982 (0.941–1.024)  |
| Region 4: Latin America                                  | 1.137 (1.075–1.199) | 1.085 (1.028–1.140)  |
| Region 5: Africa/Middle East                             | 1.096 (1.021–1.170) | 1.131 (1.058–1.194)  |
| Type of site                                             |                     |                      |
| Specialist office                                        | 1.566 (1.501–1.634) | 1.528 (1.456–1.604)  |
| Community hospital                                       | 1.496 (1.433–1.563) | 1.458 (1.391–1.528)  |
| University hospital                                      | 1.0 (ref)           | 1.0 (ref)            |
| Other <sup>b</sup>                                       | 1.579 (1.497–1.663) | 1.515 (1.431–1.602)  |

Abbreviations: AF, atrial fibrillation; CI, confidence interval; CHADS<sub>2</sub>, congestive heart failure, hypertension, age ≥ 75 years, diabetes mellitus, stroke; CHA<sub>2</sub>DS<sub>2</sub>-VASc, congestive heart failure, hypertension, age ≥75 years (doubled), diabetes, stroke/transient ischaemic attack/thromboembolism (doubled), vascular disease (prior myocardial infarction [MI], peripheral arterial disease [PAD] or aortic plaque), age 65 to 74 years, sex category (female); HAS-BLED, hypertension, abnormal renal and liver function, stroke, bleeding, labile INR (international normalized ratio), age ≥65 years, drugs or alcohol; NOAC, non-vitamin K antagonist oral anticoagulant; ref, reference; TIA, transient ischaemic attack; VKA, vitamin K antagonists.

Note: The COPY method was applied to the multivariable regression.

<sup>a</sup>In total, 1,438 patients were excluded from the analysis (1,437 for missing HAS-BLED values and 1 for missing CHADS<sub>2</sub> score).

<sup>b</sup>Other site category comprises the following subcategories: general practitioner/outpatient health care/anticoagulation clinic and other.
